# Supplementary material for: The awareness and acceptance of anti-COVID 19 vaccination in adolescence
Source: Ital J Pediatr. 2022 Dec 9;48:194. doi: 10.1186/s13052-022-01390-8 (PMC9733392; doi:10.1186/s13052-022-01390-8)
Supplement: Supplementary file 1 — Additional file 1. [file 13052_2022_1390_MOESM1_ESM.pdf]

## Questionario sulla consapevolezza e l'accettazione della vaccinazione anti- COVID 19 negli adolescenti in Italia (fascia d'età 10-17 anni)

Questa indagine anonima è proposta dal Gruppo di Studio Adolescenza della Società Italiana di Pediatria.

Viene condotta per valutare consapevolezza ed accettazione della vaccinazione anti-COVID19 negli adolescenti.

Rispondere a queste 16 semplici domande richiederà pochi minuti.

Le risposte fornite non consentono l'identificazione del partecipante.

Per ogni domanda è possibile dare solo una risposta.

**Se clicchi su "Accetto di continuare e rispondere alle domande" dai il tuo assenso a partecipare all'indagine. I risultati dell'elaborazione saranno utilizzati esclusivamente per finalità scientifiche. Il questionario è completamente anonimo. Nessuna risposta consentirà la tua identificazione.**

1.

- a) **Accetto di continuare e rispondo alle domande. (vai alla sezione 2 - inizio questionario)**
- b) **Non accetto di continuare (invio modulo)**

2. **Genere**

- a) Femmina
- b) Maschio
- c) Preferisco non specificare

3. **Qual è la tua fascia d'età?**

- a) 10-11 anni
- b) 12-14 anni
- c) 15-17 anni

4. **In quale Area dell'Italia abiti?**

- a) Nord (Piemonte, Lombardia, Val d'Aosta, Veneto, Trentino, Friuli-Venezia Giulia, Emilia-Romagna e Liguria)
- b) Centro (Toscana, Lazio, Umbria, Abruzzo, Marche)
- c) Sud (Molise, Campania, Puglia, Lucania, Calabria, Sicilia e Sardegna)

5. **Qual è la tua cittadinanza?**

- a) Entrambi i tuoi genitori sono italiani
- b) Entrambi i tuoi genitori sono stranieri
- c) Un genitore è italiano/ un genitore è straniero

5. **Hai fratelli/sorelle?**

- a) No
- b) Sì uno
- c) Sì più di uno

6. **Qual è il titolo di studio dei tuoi genitori?**

- a) Entrambi i tuoi genitori hanno il diploma o la laurea
- b) Un tuo genitore ha il diploma o laurea/ l'altro genitore ha la licenza elementare o media
- c) Entrambi i tuoi genitori hanno la licenza elementare o media

7. **Qual è lo stato lavorativo dei tuoi genitori?**

- a) Entrambi i tuoi genitori lavorano
- b) Solo uno dei tuoi genitori lavora
- c) Entrambi i tuoi i genitori sono disoccupati

8. **Quanti anni hanno i tuoi genitori?**

- a) Entrambi i tuoi genitori hanno meno di 45 anni
- b) Entrambi i tuoi genitori hanno più di 45 anni
- c) Uno dei tuoi genitori ha meno di 45 anni/ l'altro ha più di 45 anni

9. **Sei affetto da una malattia cronica?**

(diabete, obesità, malattie respiratorie, malattie del sangue, malattie intestinali, malattie degli ormoni, malattie del rene, malattie reumatiche ecc.)

- a) Sì
- b) No

**10. Ti sei vaccinato per il Covid 19?**

- c) Sì
- d) No

## Se ti sei vaccinato

**11. Se ti sei vaccinato hai fatto:**

- a) 1 dose
- b) 2 dosi
- c) 3 dosi

**12. Se ti sei vaccinato, qual è il motivo principale per cui lo hai deciso?**

- a) Paura di infettarti
- b) Paura di trasmettere l'infezione
- c) Hai avuto un familiare/amico infettato da Covid 19
- d) Hai scelto di vaccinarci come i tuoi amici coetanei
- e) Perché secondo te è necessario fare il vaccino per il bene di tutti
- f) Per tornare alla vita normale come prima della pandemia da Covid 19
- g) È stato deciso dai tuoi genitori
- h) Non volevi vaccinarci ma lo hanno deciso i tuoi genitori

## Se non ti sei vaccinato

**13. Se non ti sei ancora vaccinato programmerai la vaccinazione per covid 19 al più presto?**

- a) Sì
- b) No

**14. Se non ti sei vaccinato, qual è il motivo principale?**

- a) Non ha ricevuto abbastanza informazioni
- b) Pensi che il vaccino non sia efficace
- c) Hai paura di conseguenze pericolose
- d) Hai avuto difficoltà a prenotare
- e) I tuoi genitori non sono d'accordo sul vaccino
- f) I tuoi genitori non sono d'accordo ma tu vorresti vaccinarci

## Sezione finale

**15. Chi ha maggiormente orientato la tua scelta di vaccinarci o di non vaccinarci?**

- a) Medico di famiglia
- b) Famiglia e/o parenti
- c) Amici
- d) Televisione
- e) Social network
- f) Motori di ricerca su internet
- g) Scuola
- h) Farmacista
- i) Associazione

**16. Tramite chi vorresti ricevere informazioni sulla vaccinazione (principalmente)?**

- a) Medico di famiglia
- b) Canali televisivi con programmi dedicati
- c) Giornate dedicate a scuola
- d) Social network

**17. In generale, a parte quella per il Covid19, pensi di aver ricevuto tutte le vaccinazioni, sia quelle obbligatorie sia quelle che vengono consigliate ai bambini e ai ragazzi?**

- a) Sì
- b) No

**18. I tuoi genitori sono vaccinati?**

- a) Sì entrambi
- b) No entrambi
- c) Solo uno solo di loro è vaccinato
